# Supplementary material for: Water Adsorption on MgO Surfaces: A Vibrational Analysis
Source: MDPI journal article supplement (doi:10.3390/cryst13081153), 2023-07-25
Supplement: s1 [file s1]

## Supplementary information

# Water adsorption on MgO surfaces: a vibrational analysis

Maria Dekermenjian <sup>1</sup>, Alexandre Merlen <sup>2,\*</sup>, Andreas Ruediger <sup>1</sup> and Michel Rérat <sup>3,\*</sup>

<sup>1</sup> EMT-INRS (Centre Énergie Matériaux Télécommunications, Institut National de la Recherche Scientifique), Varennes, QC H2X 1E3, Canada; maria.dekermenjian@inrs.ca (M.D.); andreas.ruediger@inrs.ca (A.R.)

<sup>2</sup> MAPIEM (Matériaux Polymères Interfaces Environnement Marin), University of Toulon, 83130 La Garde, France

<sup>3</sup> CNRS, Institut des Sciences Analytiques et de Physico-Chimie pour l'Environnement et les Matériaux, Energy Environmnt Solutions, Université de Pau et des Pays de l'Adour, 64000 Pau, France

\* Correspondence: merlen@univ-tln.fr (A.M.); michel.rerat@univ-pau.fr (M.R.)

The following structures have been found by first optimizing the geometry of a slab of MgO made of 4 layers orthogonal to (001), (011) or (112) directions, then adding along the vertical z-direction one(two) molecule(s) of H<sub>2</sub>O to their top layer per unit surface, starting at a (HO)H---O(Mg) distance around 2 Å, before reoptimizing the whole systems.

### 1H<sub>2</sub>O/MgO (001)

|    |                     |                     |                     |
|----|---------------------|---------------------|---------------------|
| MG | -1.904152901912E+00 | 1.202386021469E-01  | 3.201138260738E+00  |
| MG | 1.204015095568E-01  | -1.932421409982E+00 | 3.060863796791E+00  |
| O  | 1.159910295503E-01  | 1.145817410893E-01  | 3.192221263135E+00  |
| O  | -1.926316481162E+00 | -1.929212018051E+00 | 3.126347341905E+00  |
| MG | 1.251270212404E-01  | 1.150565857947E-01  | 1.014745774091E+00  |
| MG | -1.925448159700E+00 | -1.929401045121E+00 | 1.025940910413E+00  |
| O  | -1.923982549320E+00 | 1.158676096850E-01  | 1.023454482258E+00  |
| O  | 1.229981329061E-01  | -1.930236630690E+00 | 1.011986361569E+00  |
| MG | -1.924071588752E+00 | 1.156275168201E-01  | -1.083098461592E+00 |
| MG | 1.236799082830E-01  | -1.929889137999E+00 | -1.092270454950E+00 |
| O  | 1.241603388932E-01  | 1.157011760497E-01  | -1.081708148621E+00 |
| O  | -1.924476056465E+00 | -1.929953170556E+00 | -1.082219135231E+00 |
| MG | 1.239833363805E-01  | 1.157439747447E-01  | -3.171896808139E+00 |
| MG | -1.924300716317E+00 | -1.930105663901E+00 | -3.170673547118E+00 |
| O  | -1.924118775344E+00 | 1.153824394746E-01  | -3.237216333654E+00 |
| O  | 1.239082730244E-01  | -1.929829543824E+00 | -3.237708678138E+00 |
| H  | 7.634068929402E-01  | 5.947582701023E-02  | 4.892723337785E+00  |
| H  | 1.764855594586E+00  | -8.484359802521E-01 | 5.673599916758E+00  |
| O  | 1.627523230280E+00  | 7.098433046348E-02  | 5.387127452240E+00  |

### 2H<sub>2</sub>O/MgO (001)

|    |                     |                     |                     |
|----|---------------------|---------------------|---------------------|
| MG | -1.982654131534E+00 | 1.215467083197E-01  | 3.040216494402E+00  |
| MG | 2.290227884111E-02  | -1.935925402323E+00 | 3.143927242696E+00  |
| O  | 4.783251529901E-02  | 1.126379561380E-01  | 3.166829591678E+00  |
| O  | -2.025977270752E+00 | -1.934531897764E+00 | 3.070108552078E+00  |
| MG | 4.443448282780E-02  | 1.174862873840E-01  | 9.819486434056E-01  |
| MG | -2.011702074716E+00 | -1.937504495584E+00 | 9.896206363868E-01  |
| O  | -2.002054129828E+00 | 1.153896074899E-01  | 9.780182574656E-01  |
| O  | 3.387780556211E-02  | -1.935614063868E+00 | 9.894891079057E-01  |
| MG | -2.005287087596E+00 | 1.143828729468E-01  | -1.123472574416E+00 |
| MG | 3.729228693129E-02  | -1.934469243541E+00 | -1.116531667260E+00 |

|    |                     |                     |                     |
|----|---------------------|---------------------|---------------------|
| O  | 3.986522280198E-02  | 1.186285465960E-01  | -1.113580542734E+00 |
| O  | -2.008304296686E+00 | -1.938750455126E+00 | -1.114978312323E+00 |
| MG | 3.879546695331E-02  | 1.188337523868E-01  | -3.202400950387E+00 |
| MG | -2.007584588038E+00 | -1.939112176819E+00 | -3.201645456216E+00 |
| O  | -2.006331955061E+00 | 1.140325489372E-01  | -3.268557282424E+00 |
| O  | 3.829697311035E-02  | -1.934137681282E+00 | -3.268039103891E+00 |
| H  | 8.246055911627E-01  | 5.572485484699E-03  | 4.783833426559E+00  |
| H  | -2.004337790737E+00 | -6.986269721100E-01 | 5.512637544046E+00  |
| O  | 1.620469030352E+00  | 1.620038470775E-01  | 5.377156739376E+00  |
| H  | -1.235043165610E+00 | 1.413257560249E+00  | 5.332407305397E+00  |
| H  | 1.072858513590E-01  | 1.734468521331E+00  | 6.053477241622E+00  |
| O  | -5.447059430917E-01 | -1.991071353050E+00 | 5.439915142823E+00  |

H<sub>2</sub>O/MgO (011)

|    |                     |                     |                     |
|----|---------------------|---------------------|---------------------|
| MG | -1.738668769551E+00 | 8.828673857682E-01  | 2.090725566598E+00  |
| MG | -1.775612749862E+00 | -1.963329463497E+00 | 2.339597579032E+00  |
| O  | 2.348718849224E-01  | 9.269754507271E-01  | 2.214771201358E+00  |
| O  | 2.108313746076E-01  | -2.157790331087E+00 | 2.176591064511E+00  |
| MG | 2.217911625352E-01  | -7.067241459057E-01 | 7.762057973000E-01  |
| MG | 2.286452342291E-01  | 2.620010048982E+00  | 9.040391912722E-01  |
| O  | -1.763198188355E+00 | -6.108062337446E-01 | 7.270981894149E-01  |
| O  | -1.756114004897E+00 | 2.463278598502E+00  | 8.617978234603E-01  |
| MG | -1.760673927871E+00 | -2.198304578048E+00 | -8.338543639510E-01 |
| MG | -1.761892714799E+00 | 9.182013563615E-01  | -8.187463444889E-01 |
| O  | 2.243440583821E-01  | -2.193697106215E+00 | -7.647458523493E-01 |
| O  | 2.231293994974E-01  | 9.180094138254E-01  | -7.376629976759E-01 |
| MG | 2.242522151822E-01  | 2.482052900394E+00  | -2.010290142027E+00 |
| MG | 2.239360139696E-01  | -6.254951350119E-01 | -2.063523420256E+00 |
| O  | -1.760654993318E+00 | 2.484388825536E+00  | -2.149078415380E+00 |
| O  | -1.761041635612E+00 | -6.410753907167E-01 | -2.199157957182E+00 |
| H  | 3.348142677075E-01  | 4.649519247362E-01  | 3.073817158020E+00  |
| O  | -1.873831802521E+00 | -3.708162894907E-01 | 3.633373150459E+00  |
| H  | -1.259621944696E+00 | -4.078660596996E-01 | 4.379042771881E+00  |

H<sub>2</sub>O/MgO (112)

|    |                     |                     |                     |
|----|---------------------|---------------------|---------------------|
| MG | 2.138550181007E+00  | 1.042172223766E+00  | 2.053171973981E+00  |
| MG | -7.155210031359E-01 | 1.042114187334E+00  | 2.053177525789E+00  |
| O  | -7.581129870649E-01 | -4.483272362240E-01 | 9.232965662939E-01  |
| O  | 2.181755426329E+00  | -4.482817917245E-01 | 9.232909064382E-01  |
| MG | 7.117583876179E-01  | -2.845097120601E-01 | -4.801346513736E-01 |
| MG | -2.240774918513E+00 | -2.012165450457E-01 | -4.303539438189E-01 |
| O  | -2.241043487840E+00 | 2.229965058343E+00  | 1.625640110598E+00  |
| O  | 7.114960663864E-01  | 2.540448726544E+00  | 1.627887274296E+00  |
| MG | -8.214965184615E-01 | -2.356992815508E+00 | 5.641452094664E-01  |
| MG | 2.245283214561E+00  | -2.356966757679E+00 | 5.640514795489E-01  |
| O  | 2.187873719468E+00  | 9.598614223969E-01  | -1.480420828354E+00 |
| O  | -7.645334740169E-01 | 9.597266710686E-01  | -1.480475985536E+00 |
| MG | -2.240900439049E+00 | 2.116405669076E+00  | -1.630612234098E+00 |
| MG | 7.116258498775E-01  | 2.093773711429E+00  | -1.683473125177E+00 |
| O  | 7.119067788561E-01  | -2.208049464357E+00 | -7.995773692652E-01 |
| O  | -2.240587891253E+00 | -2.132891994331E+00 | -8.319462038170E-01 |
| H  | 7.119418459012E-01  | -2.939386454500E+00 | 2.507002108597E+00  |
| H  | 7.116248224738E-01  | 2.086173920622E-03  | 4.016666053317E+00  |
| O  | 7.115967831169E-01  | 7.921175418091E-01  | 3.458665133113E+00  |
